# Supplementary material for: Impaired eIF5A function causes a Mendelian disorder that is partially rescued in model systems by spermidine
Source: PubMed Central journal article supplement (PMC7864902; doi:10.1038/s41467-021-21053-2), 2021-02-05
Supplement: 41467_2021_21053_MOESM3_ESM.pdf [file 41467_2021_21053_MOESM3_ESM.pdf]

### **Description of Additional Supplementary Files**

File Name: Supplementary Data 1.

Description: Catalogue of known human microcephaly-associated genes and their polyproline tract content.
